# Supplementary material for: Viscoelasticity of pore-spanning polymer membranes derived from giant polymersomes
Source: Royal Society of Chemistry journal article supplement (doi:10.1039/b924650a), 2010-01-01
Supplement: b924650a.pdf [file b924650a.pdf]

Supplementary Material (ESI) for *Soft Matter*

Viscoelasticity of pore-spanning polymer membranes derived from  
giant polymersomes

Marta Kocun,<sup>a</sup> Waltraut Mueller,<sup>b</sup> Michael Maskos,<sup>b,c</sup> Ingo Mey,<sup>a</sup> Burkhard Geil,<sup>a</sup> Claudia Steinem<sup>d</sup> and Andreas Janshoff<sup>a,\*</sup>

<sup>a</sup> Institute of Physical Chemistry, University of Göttingen, Tammannstr. 6, 37077 Göttingen, Germany.

<sup>b</sup> Institute of Physical Chemistry, University of Mainz, Jakob Welder Weg 11, 55128 Mainz, Germany.

<sup>c</sup> Federal Institute of Materials Research and Testing BAM, Unter den Eichen 87, 12205 Berlin, Germany

<sup>d</sup> Institute of Organic and Biomolecular Chemistry, University of Göttingen, Tammannstr. 2, 37077 Göttingen, Germany.

Supplementary information

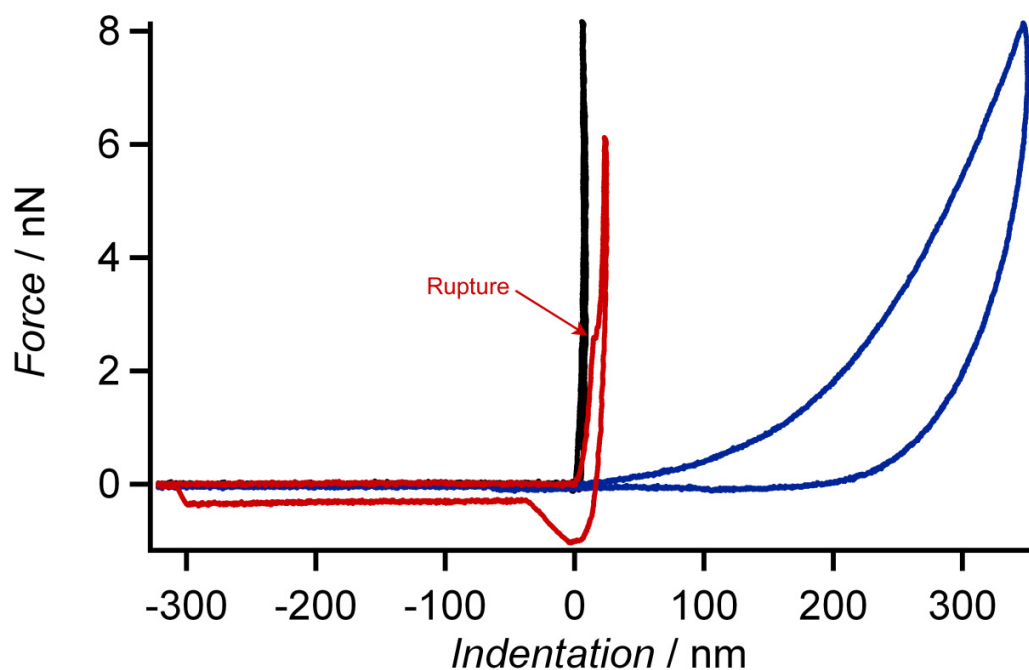

**Figure S1:** Difference between a force curve performed on the flat part of the substrate (black), force curve performed on the flat part covered with a polymer bilayer (red) and a force curve performed on bilayer-covered pore (blue). As the polymer membrane is compressed on the hard, flat surface the polymer ruptures (Rupture in the red curve).
